# Supplementary material
Source: PubMed Central journal article supplement (PMC7965905)
Supplement: 4065_table.pdf [file 4065_table.pdf]

**On-line Table: Multivariate analysis for progression-free survival**

| Characteristics         | PFS     |       |              |
|-------------------------|---------|-------|--------------|
|                         | P Value | HR    | 95% CI       |
| Age (40 yr or older)    | .015    | 3.400 | 1.269–9.111  |
| Sex (male)              | .462    | 1.461 | 0.532–4.014  |
| History of seizures     | .349    | 1.772 | 0.535–5.867  |
| Pathology               | .252    | 0.668 | 0.335–1.332  |
| p53 mutation            | .137    | 0.311 | 0.067–1.451  |
| Preoperative KPS (<80)  | .024    | 9.222 | 1.331–63.882 |
| Located in VLSM regions | .010    | 3.909 | 1.388–11.009 |

**Note:**—HR indicates hazard ratio; KPS, Karnofsky Performance Status Scale.
